# Supplementary material for: Multifunctional gene delivery vectors containing different liver-targeting fragments for specifically transfecting hepatocellular carcinoma (HCC) cells
Source: Royal Society of Chemistry journal article supplement (doi:10.1039/d3tb01866k), 2023-01-01
Supplement: d3tb01866k1.pdf [file d3tb01866k1.pdf]

## **Multifunctional gene delivery vectors containing different liver-targeting fragments for specifically transfecting hepatocellular carcinoma (HCC) cells**

Qin Cheng <sup>a, b, 1</sup>, Taoran Wang <sup>a, 1</sup>, Jing Zhang <sup>a, b</sup>, Long Tian <sup>a, c</sup>, Chunlan Zeng <sup>a</sup>, Zhao Meng <sup>a, \*</sup>, Changhao Zhang <sup>b, \*</sup>, Qingbin Meng <sup>a, c, \*</sup>

*<sup>a</sup> State Key laboratory of Toxicology and Medical Countermeasures, Beijing institute of Pharmacology and Toxicology, Beijing, 100850, China*

*<sup>b</sup> Key laboratory of Natural Medicines of the Changbai Mountain, Ministry of education, College of Pharmacy, Yanbian University, Yanji, 133002, China*

*<sup>c</sup> Key Laboratory of Structure-Based Drug Design and Discovery of the Ministry of Education, Shenyang Pharmaceutical University, Shenyang, 110016, China*

<sup>1</sup> These authors contributed to the work equally.

\* Corresponding author.

Author Email Address:

Zhao Meng: mengzhao900817@163.com

Changhao Zhang: zhangch@ybu.edu.cn

Qingbin Meng: nankaimqb@sina.com

**Table S1.** Sequences and molecular weights (MWs) of peptides.

**Figure S1.** RP-HPLC of peptide vectors.

**Figure S2.** MALDI-TOF-MS or ESI-MS of peptide vectors.

**Figure S3.** Agarose gel electrophoresis assays of peptide vectors at different N/P ratios.

**Figure S4.** TEM images of peptide/DNA complexes at the N/P ratio of 10. The scale bar represents 200 nm.

**Table S2.** The concentrations of peptide/DNA complexes in the cytotoxicity analysis.

**Figure S5.** Flow cytometric analysis of cellular uptake mechanisms of H-02/DNA (A) and H-09/DNA (B) complexes in HepG2 cells using specific endocytosis inhibitors.

The DNA was labeled with YOYO-1.

**Table S3.** The mean intensity of the green fluorescence in HepG2 and LO2 cells measured by ImageJ in CLSM analysis.

**Table S4.** The CLR of DAPI and YOYO-1 in live-cell imaging experiments.

**Table S1.** Sequences and molecular weights of peptides.

| Compounds | Peptide sequences                                                              | MWs        |          |
|-----------|--------------------------------------------------------------------------------|------------|----------|
|           |                                                                                | Calculated | Measured |
| H-01      | K(C <sub>18</sub> )-(LLHH) <sub>3</sub> -R <sub>9</sub>                        | 3359.38    | 3361.07  |
| H-02      | KVGGNY-K(C <sub>18</sub> )-(LLHH) <sub>3</sub> -R <sub>9</sub>                 | 3937.82    | 3938.32  |
| H-03      | KVGGNYNYLYRLF-K(C <sub>18</sub> )-(LLHH) <sub>3</sub> -R <sub>9</sub>          | 4907.94    | 4909.86  |
| H-04      | NGVEGFN-K(C <sub>18</sub> )-(LLHH) <sub>3</sub> -R <sub>9</sub>                | 4036.86    | 4037.77  |
| H-05      | HAIYPRH-K(C <sub>18</sub> )-(LLHH) <sub>3</sub> -R <sub>9</sub>                | 4194.12    | 4191.07  |
| H-06      | AHLHNRS-K(C <sub>18</sub> )-(LLHH) <sub>3</sub> -R <sub>9</sub>                | 4135.00    | 4132.08  |
| H-07      | DYEMHLWWGTEL-K(C <sub>18</sub> )-(LLHH) <sub>3</sub> -R <sub>9</sub>           | 4880.84    | 4877.56  |
| H-08      | THVSPNQGLPS-K(C <sub>18</sub> )-(LLHH) <sub>3</sub> -R <sub>9</sub>            | 4494.38    | 4491.35  |
| H-09      | KSLSRHDHIIHHH-K(C <sub>18</sub> )-(LLHH) <sub>3</sub> -R <sub>9</sub>          | 4804.75    | 4803.59  |
| H-10      | SFSIIHTPILPL-K(C <sub>18</sub> )-(LLHH) <sub>3</sub> -R <sub>9</sub>           | 4638.72    | 4635.55  |
| H-11      | GNY-K(C <sub>18</sub> )-(LLHH) <sub>3</sub> -R <sub>9</sub>                    | 3653.46    | 3652.47  |
| H-12      | GVKYNG-K(C <sub>18</sub> )-(LLHH) <sub>3</sub> -R <sub>9</sub>                 | 3937.82    | 3934.97  |
| H-13      | DHIIHHH-K(C <sub>18</sub> )-(LLHH) <sub>3</sub> -R <sub>9</sub>                | 4095.95    | 4095.23  |
| H-14      | HKHDSHLISHRH-K(C <sub>18</sub> )-(LLHH) <sub>3</sub> -R <sub>9</sub>           | 4804.75    | 4801.88  |
| H-15      | KVGGNY                                                                         | 635.72     | 637.05   |
| H-16      | KSLSRHDHIIHHH                                                                  | 1502.65    | 1502.47  |
| H-17      | K(C <sub>18</sub> )-C(Cy5.5)-(LLHH) <sub>3</sub> -R <sub>9</sub>               | 4127.11    | 4131.12  |
| H-18      | KSLSRHDHIIHHH-K(C <sub>18</sub> )-C(Cy5.5)-(LLHH) <sub>3</sub> -R <sub>9</sub> | 5612.74    | 5617.75  |

H-01

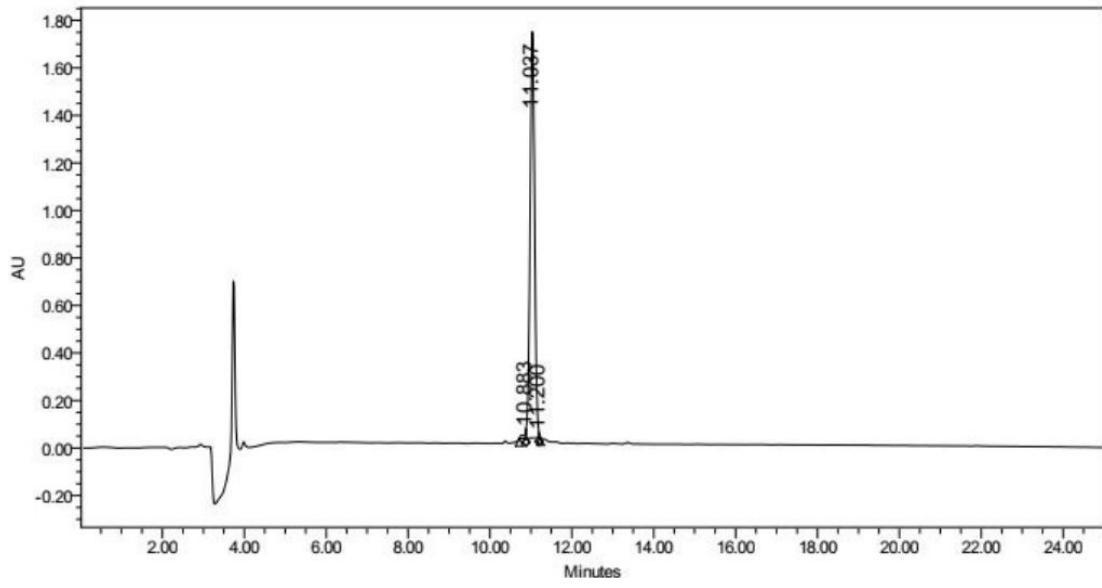

H-02

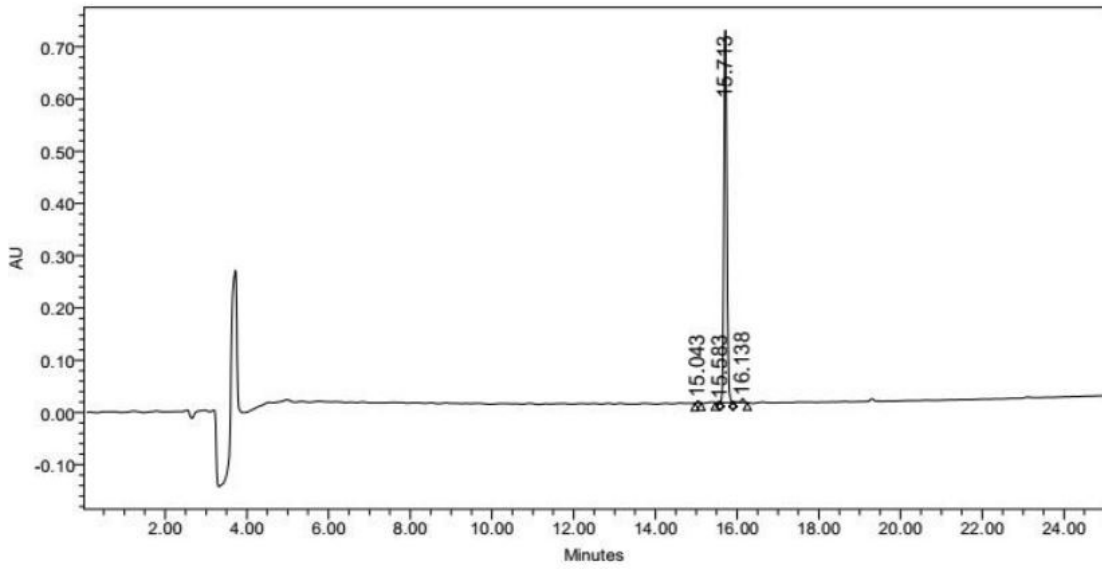

H-03

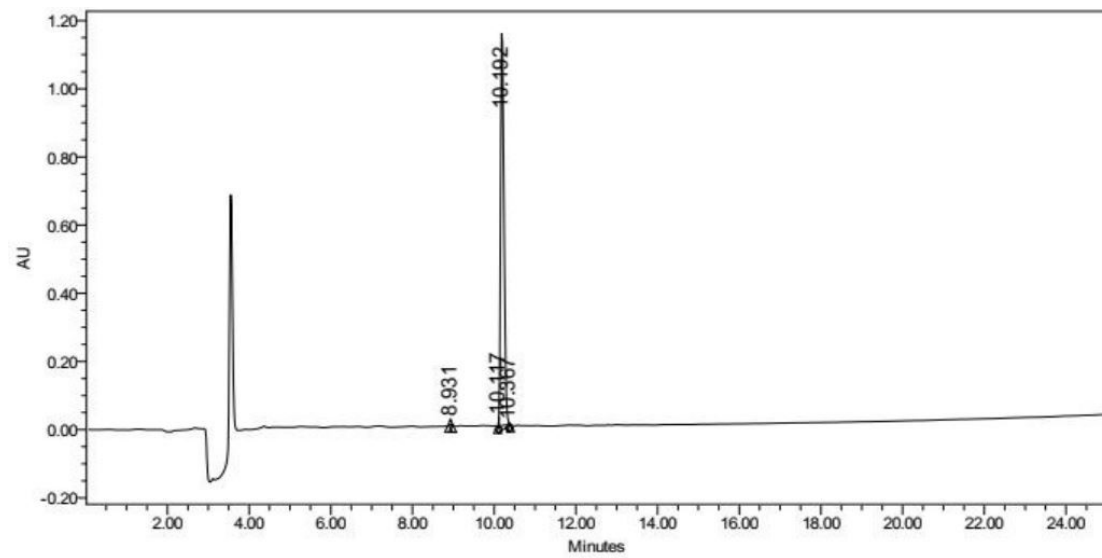

### H-04

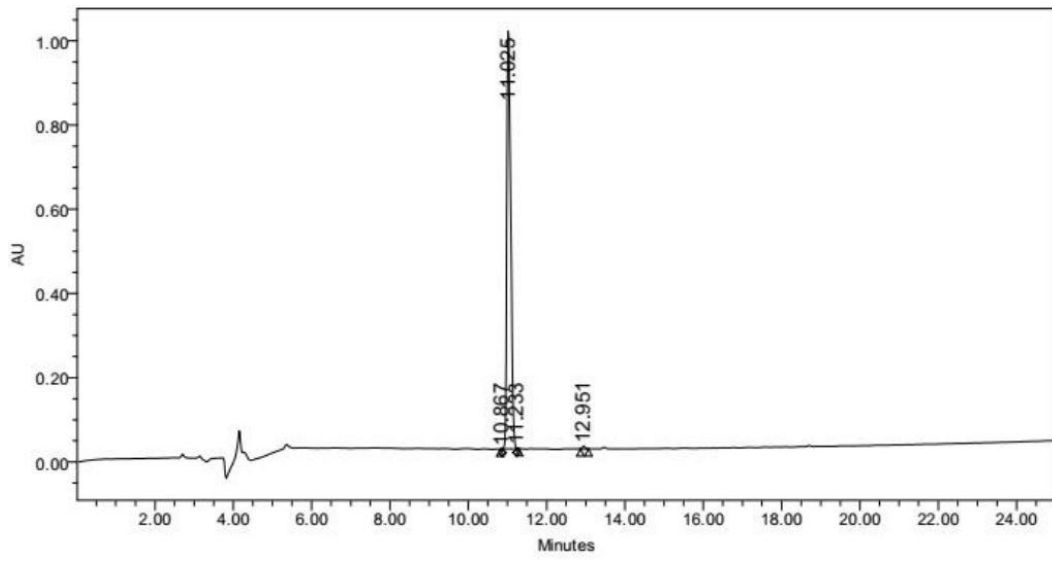

H-

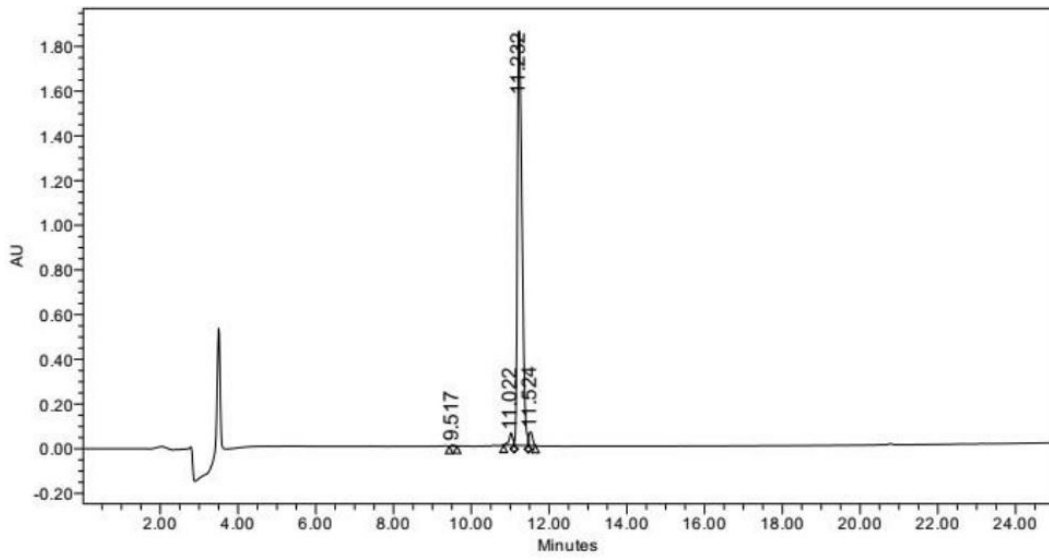

05

### H-06

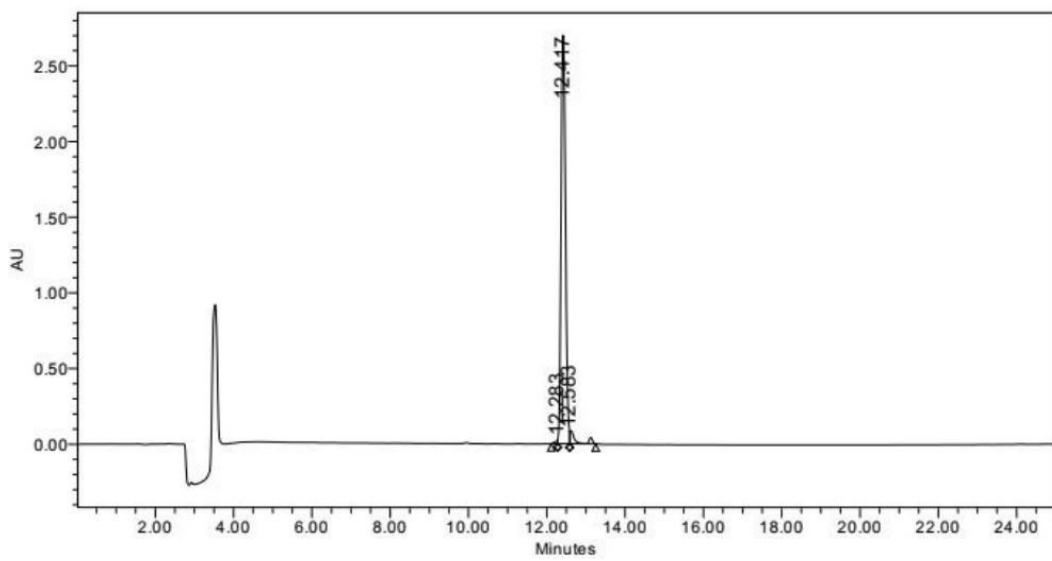

H-

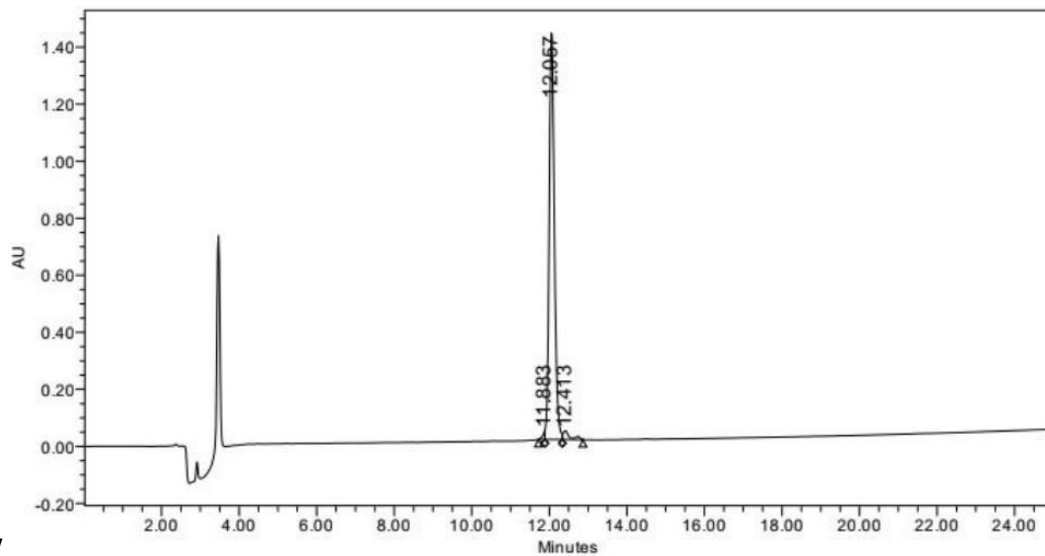

07

H-08

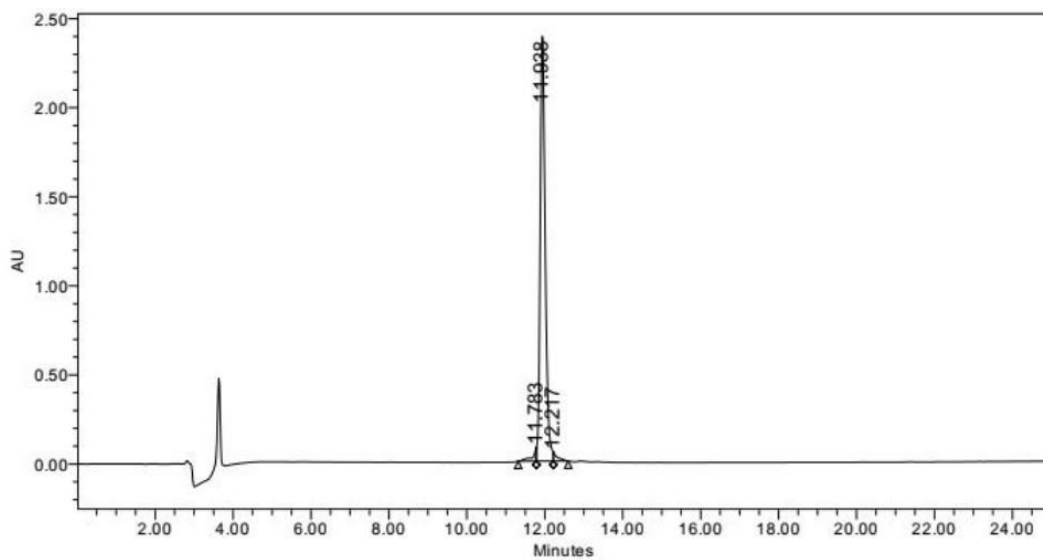

H-

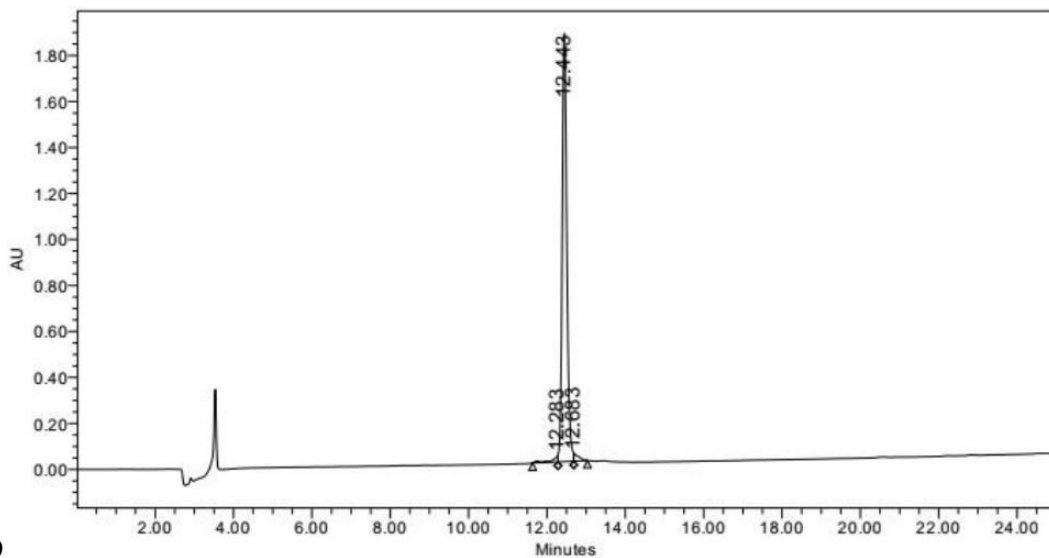

09

H-10

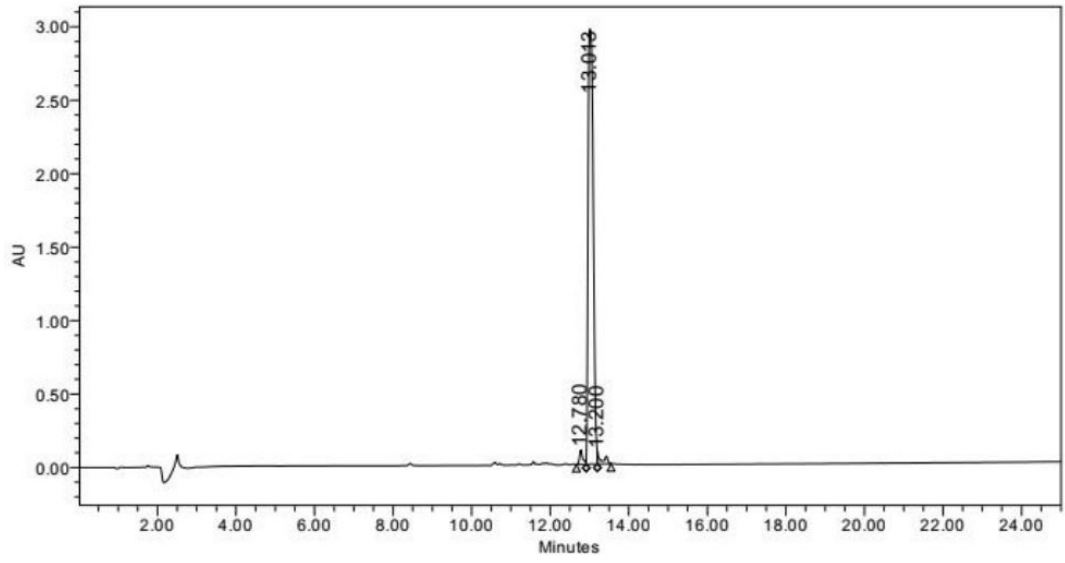

H-

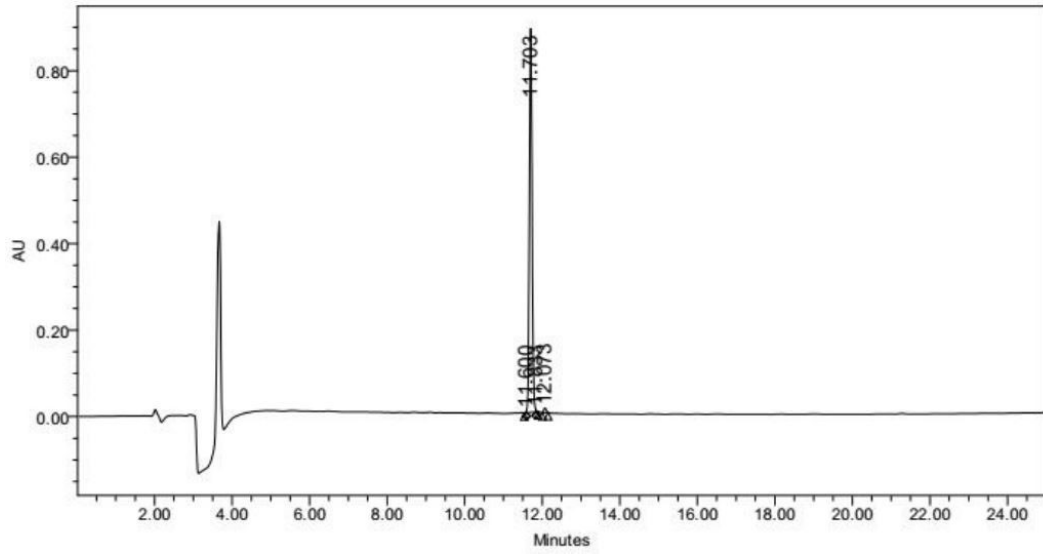

11

H-12

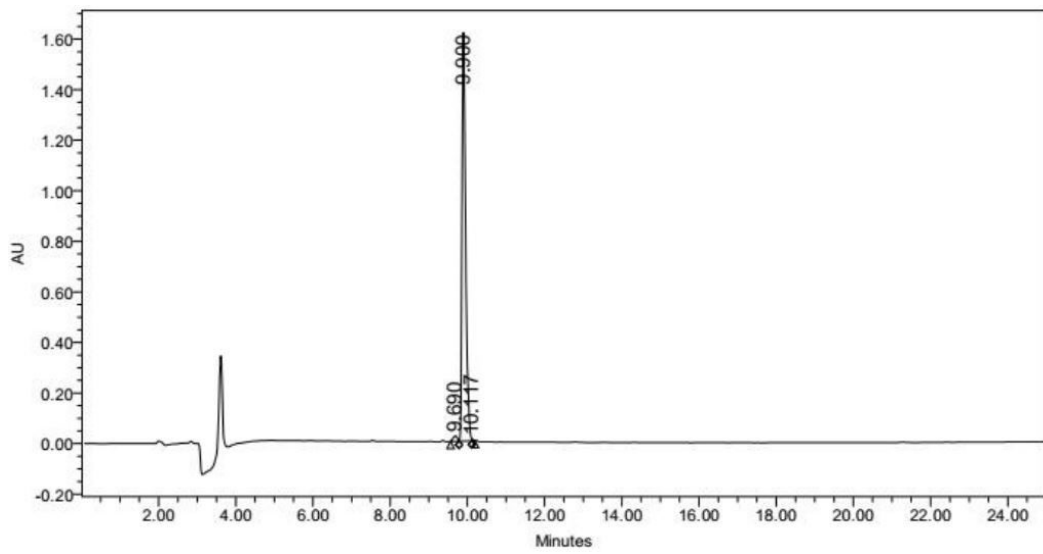

H-13

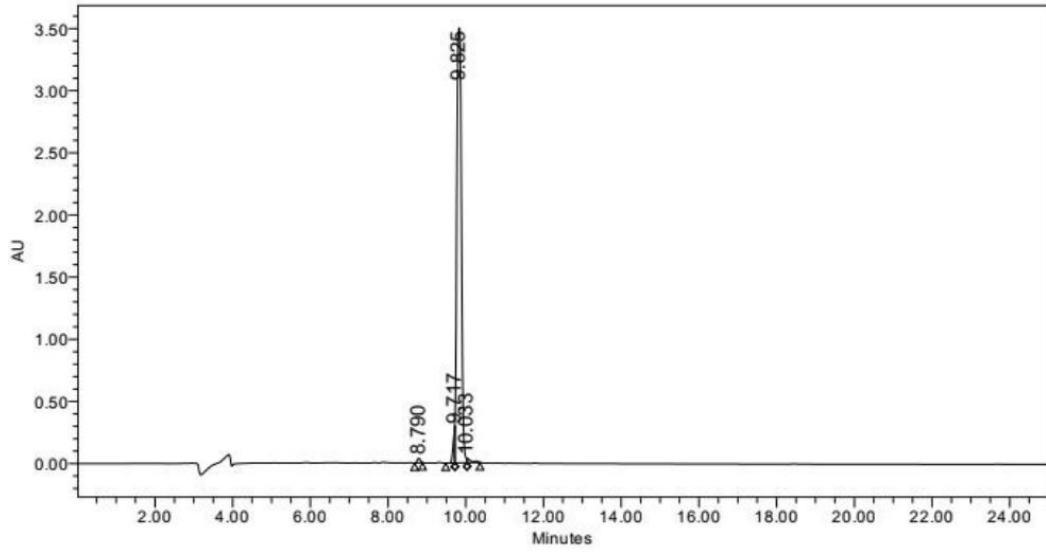

H-

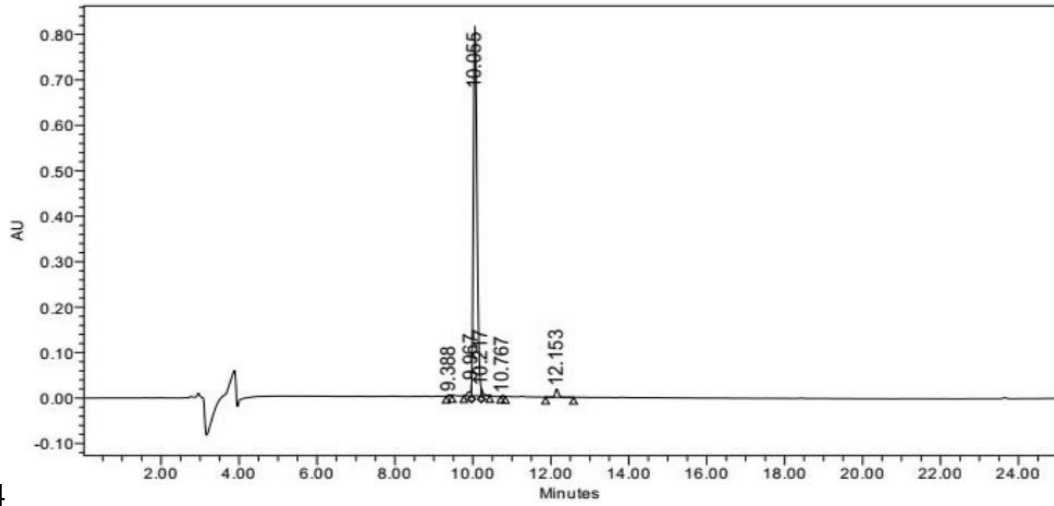

14

H-15

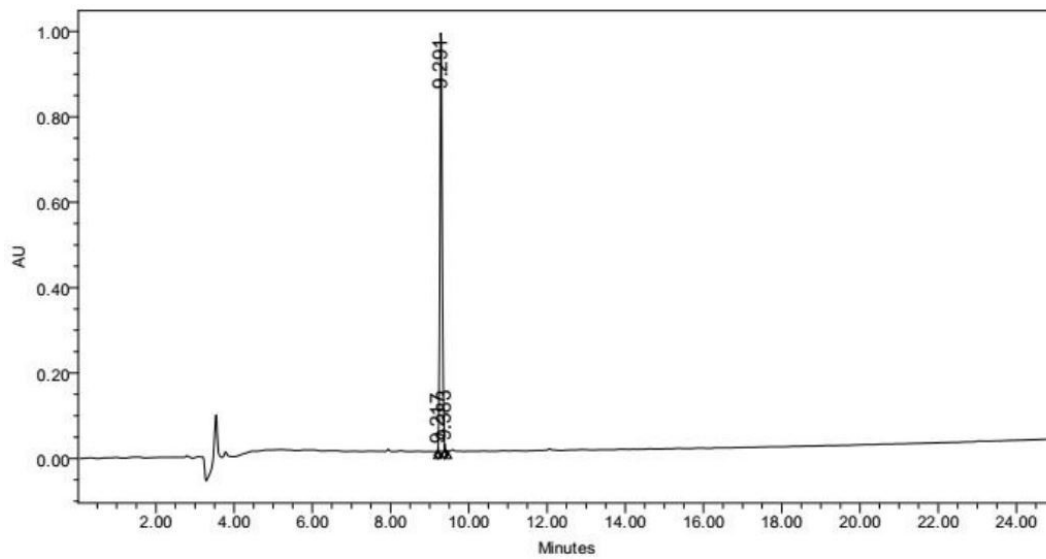

H-

16

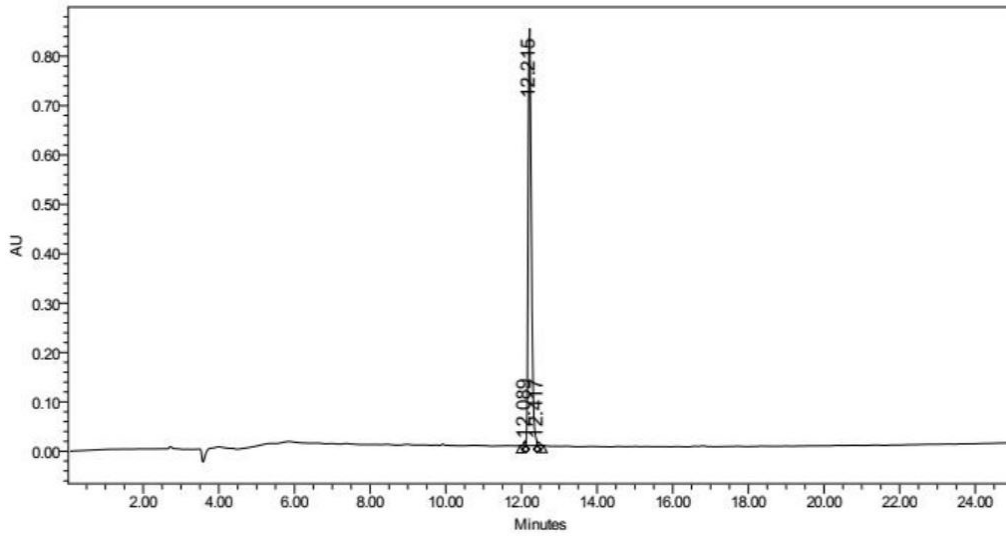

H-17

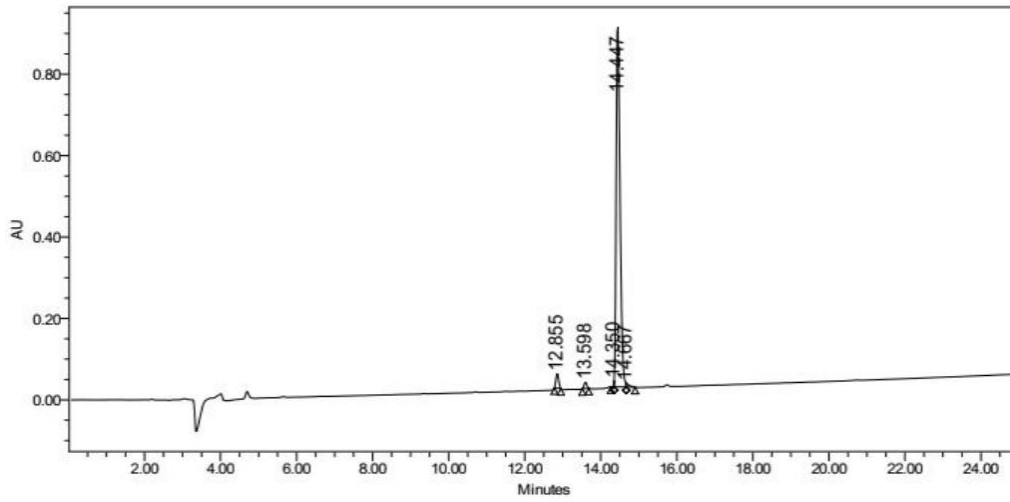

H-18

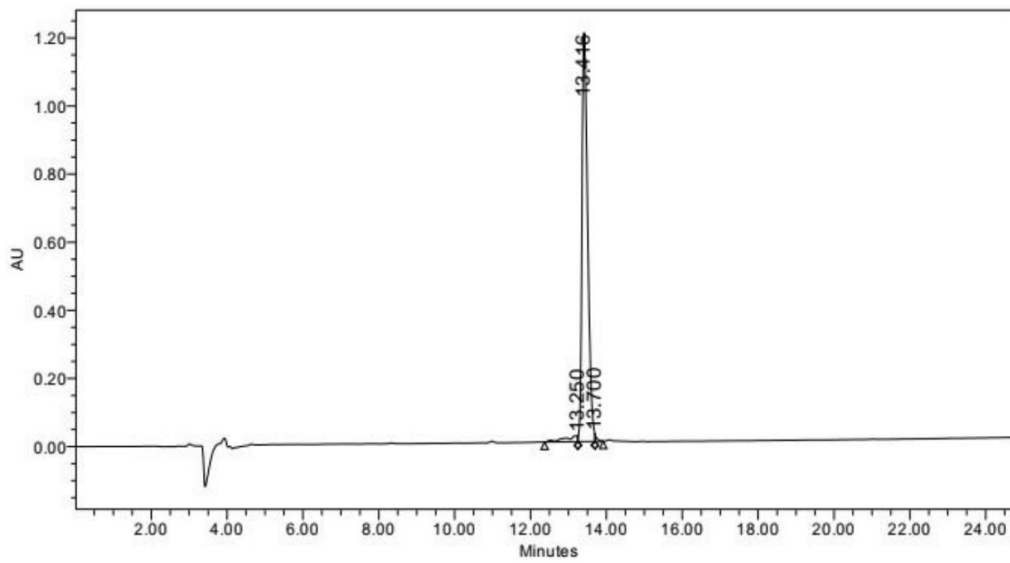

Figure S1. RP-HPLC of peptide vectors.

H-01



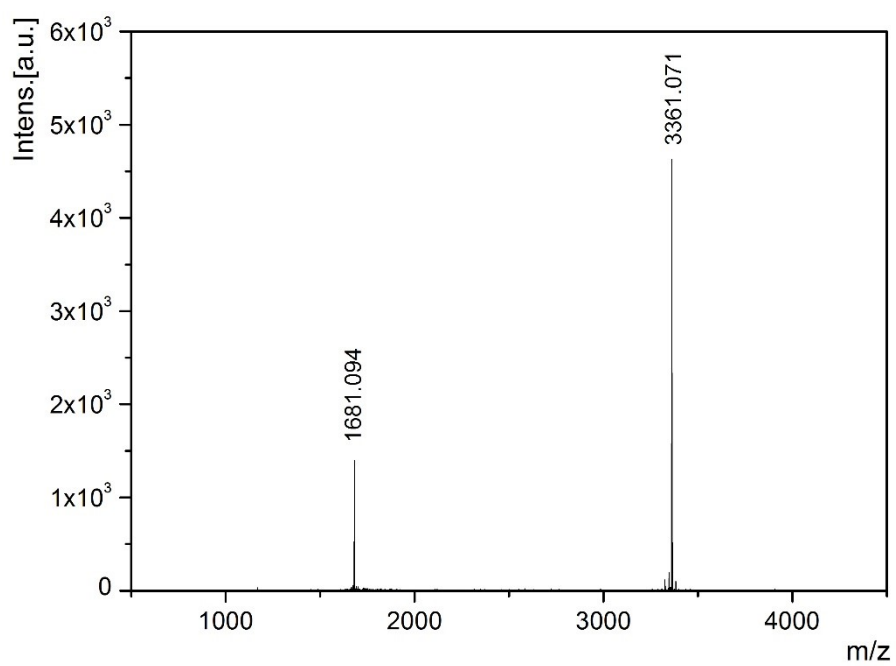

H-02

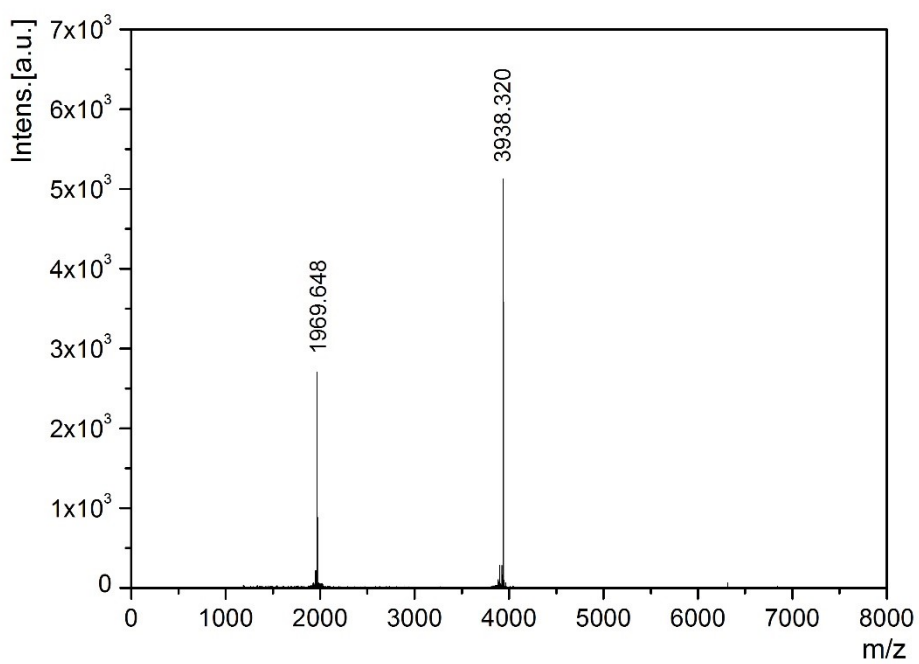

H-03

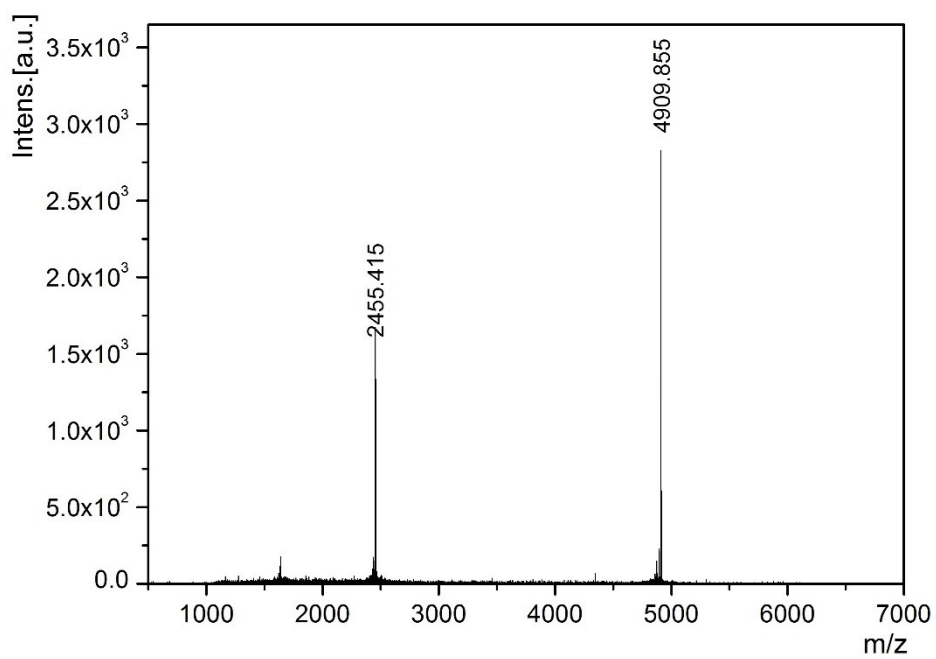

H-04

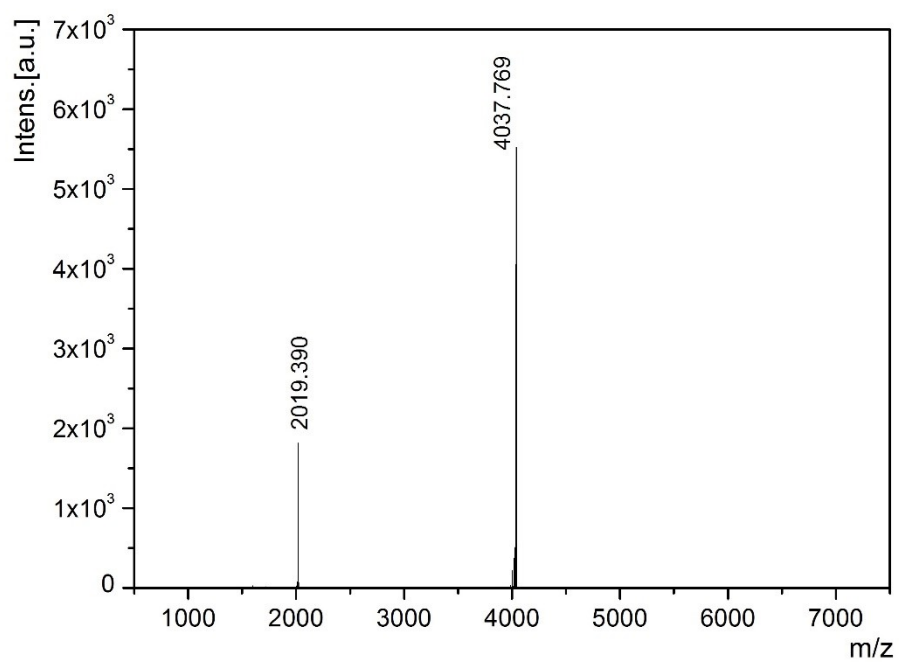

H-05

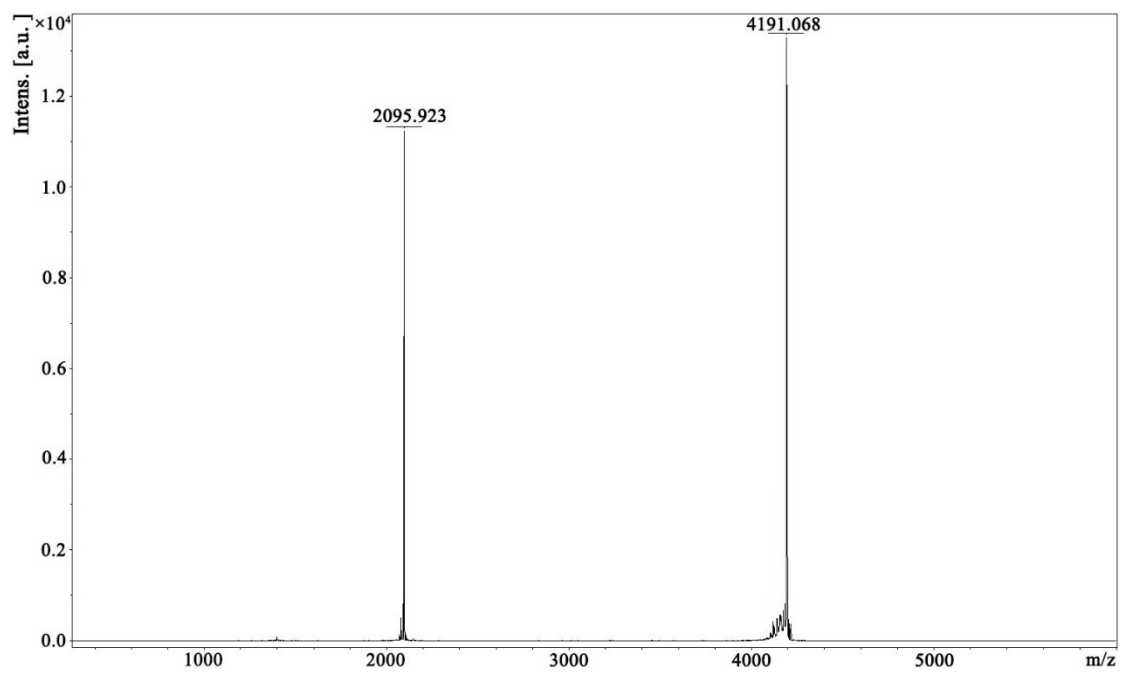

H-06

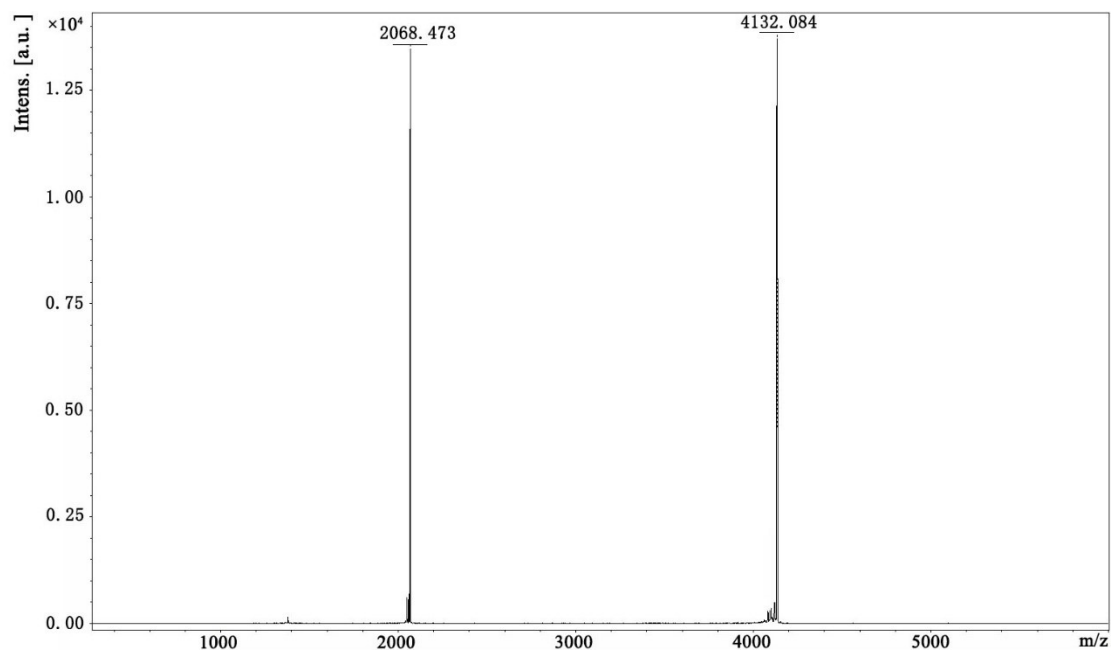

H-07

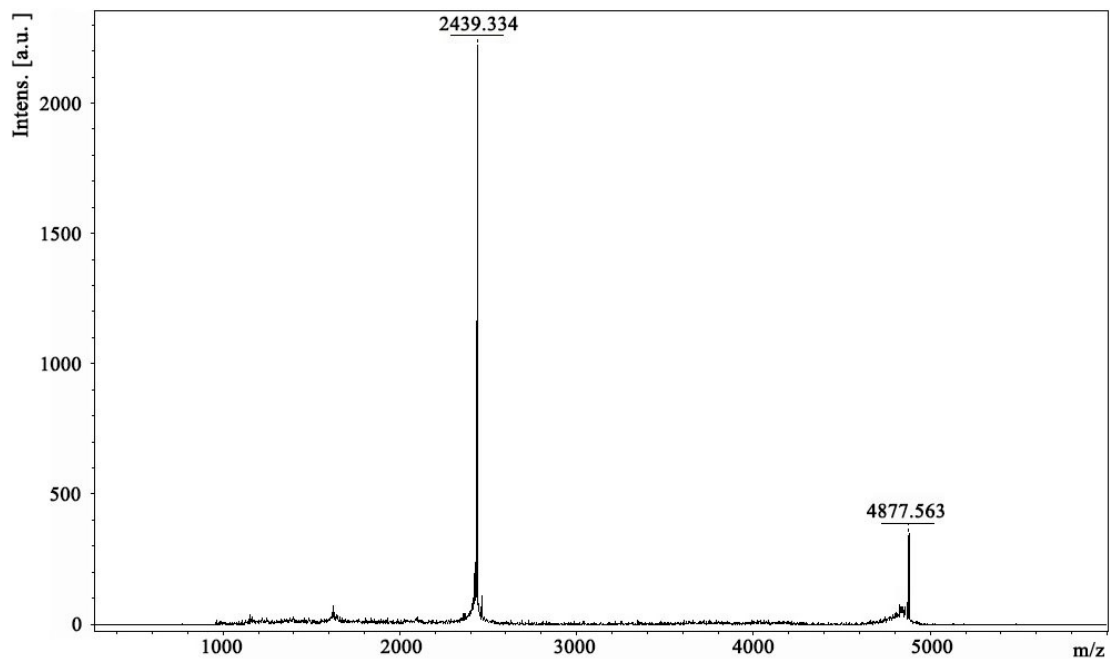

H-08

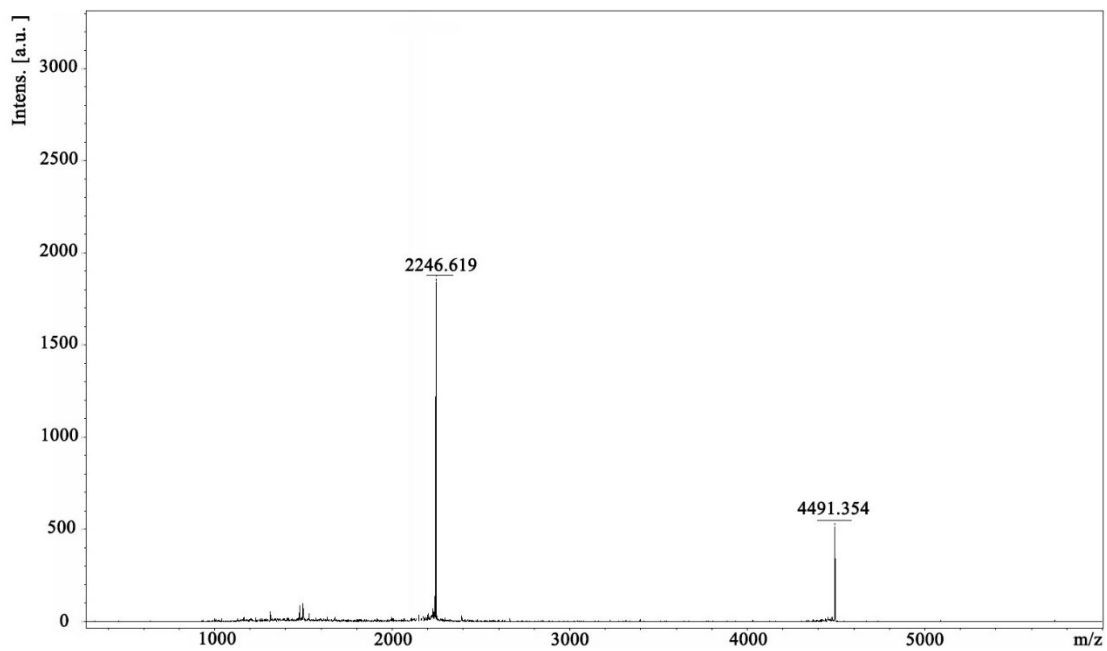

H-09

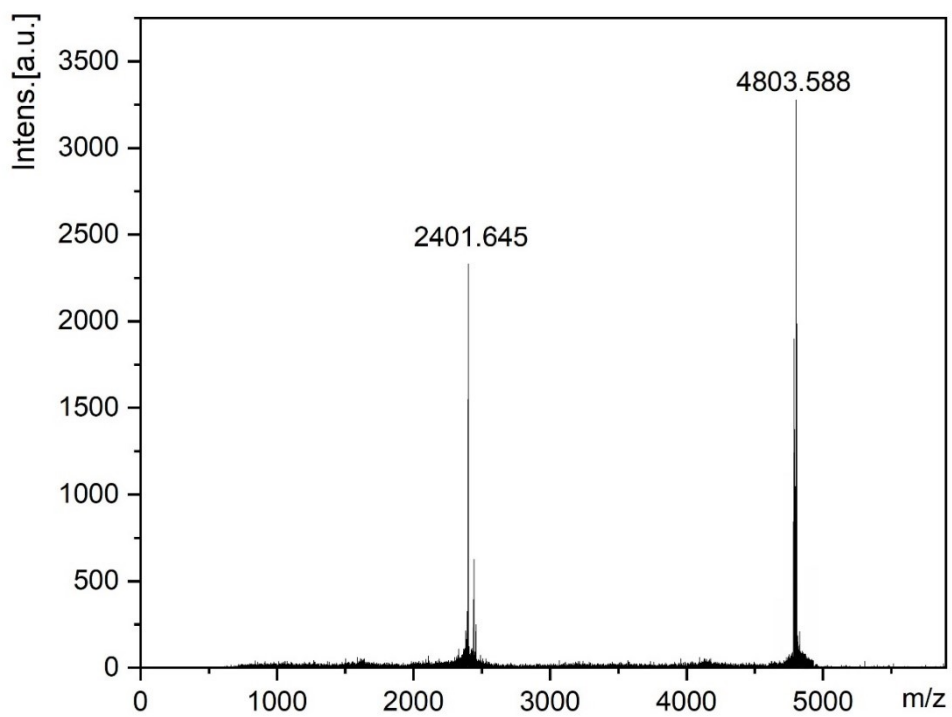

H-10

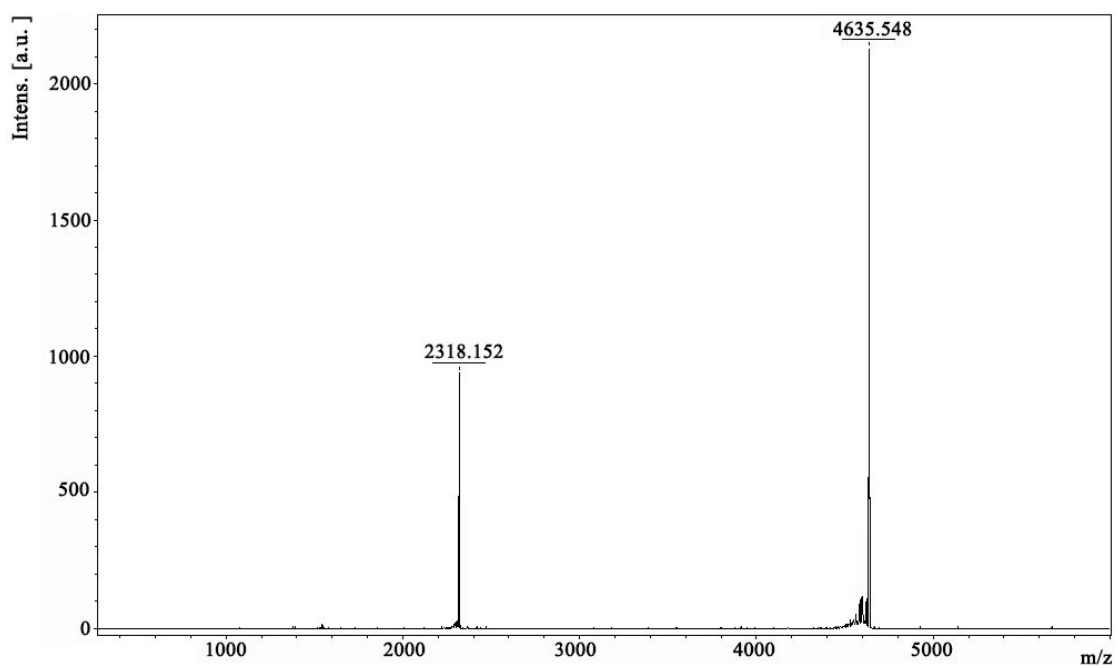

H-11

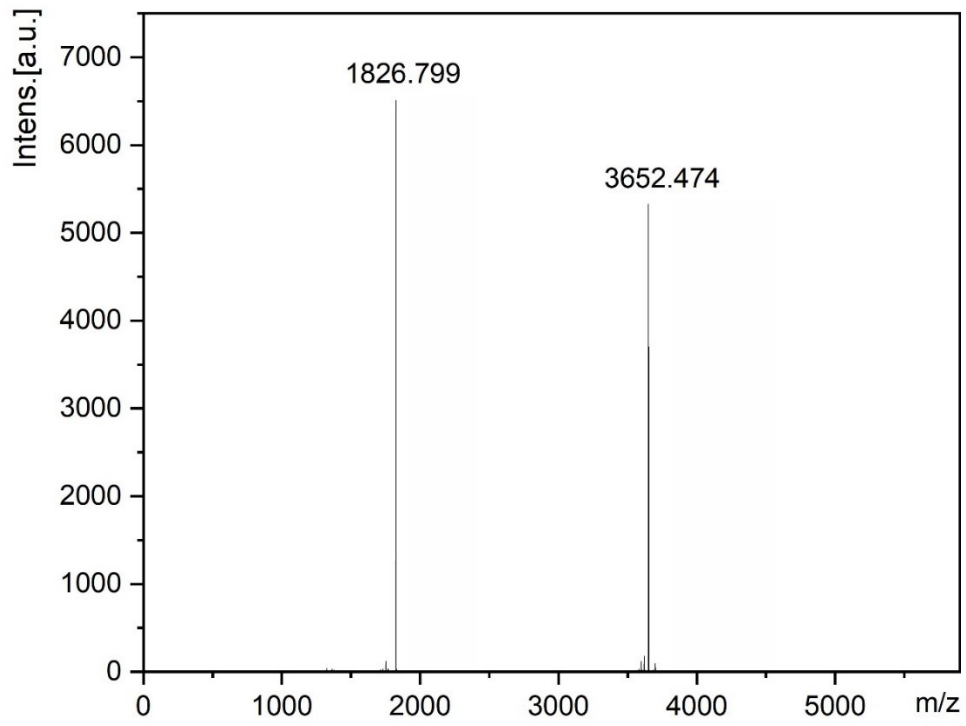

H-12

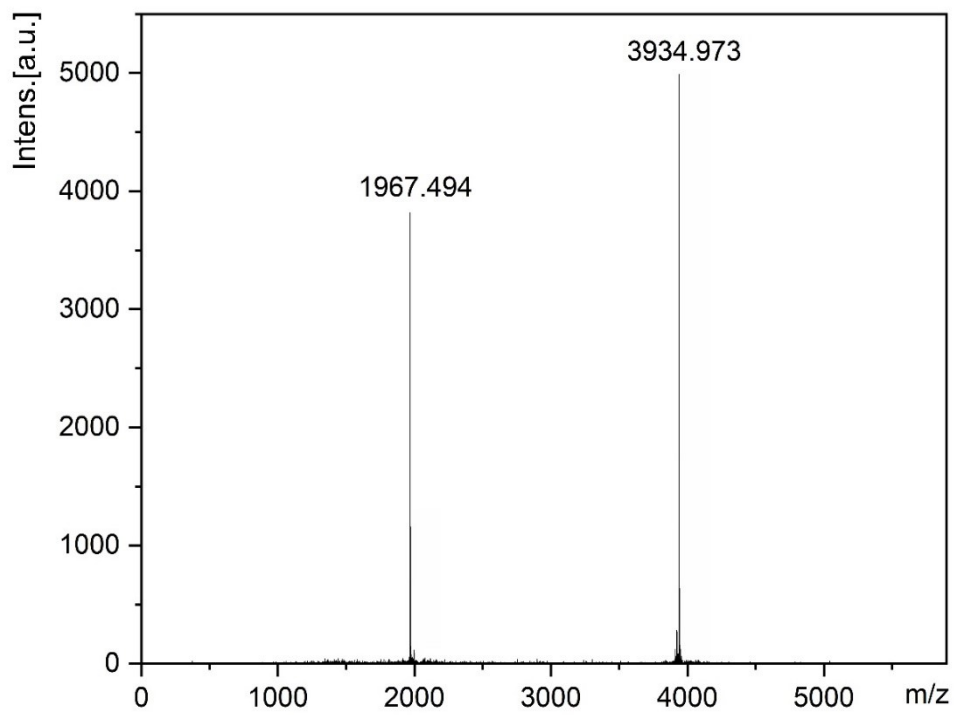

H-13

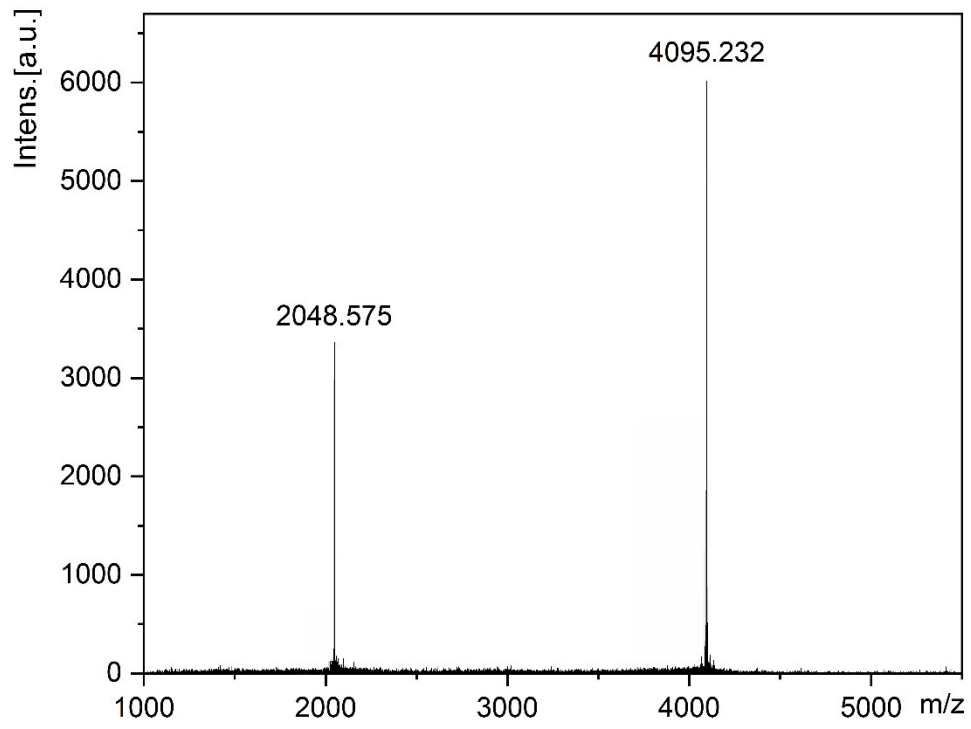

H-14

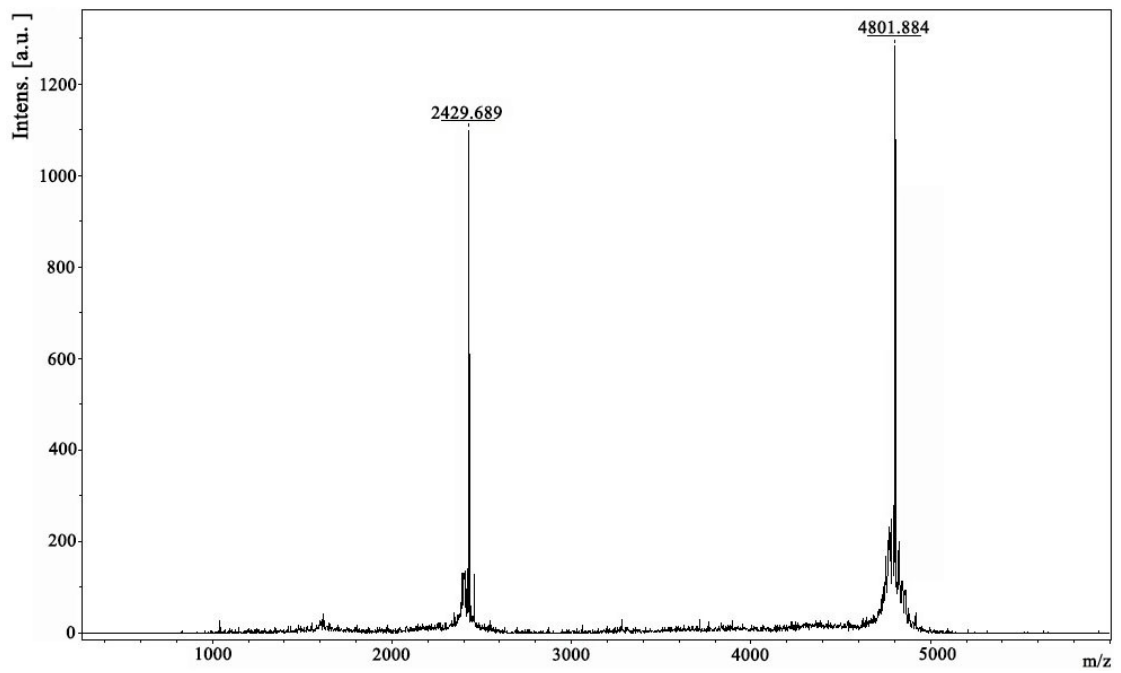

H-15

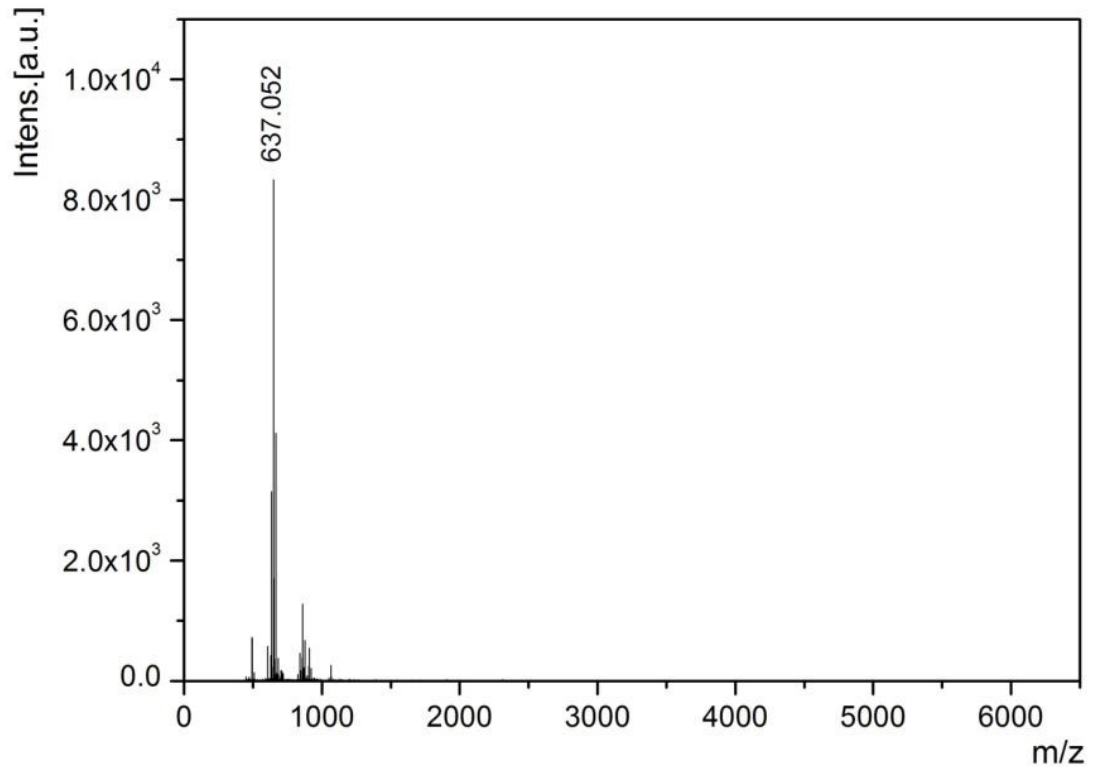

H-16

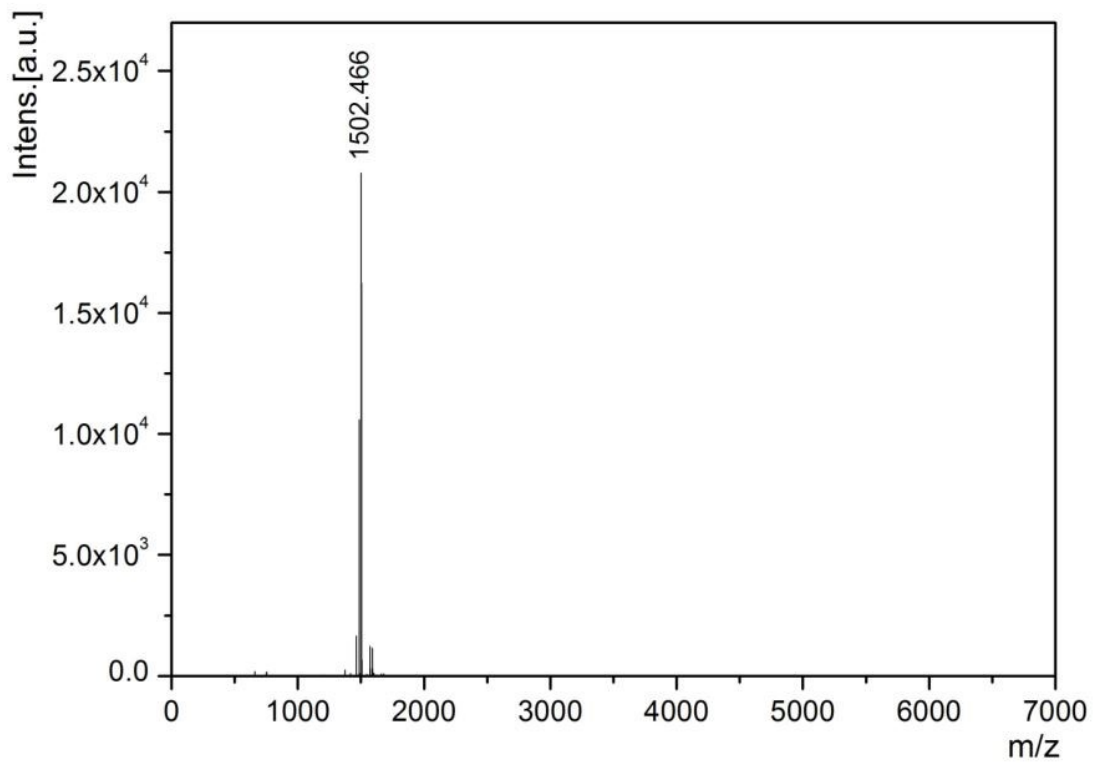

H-17



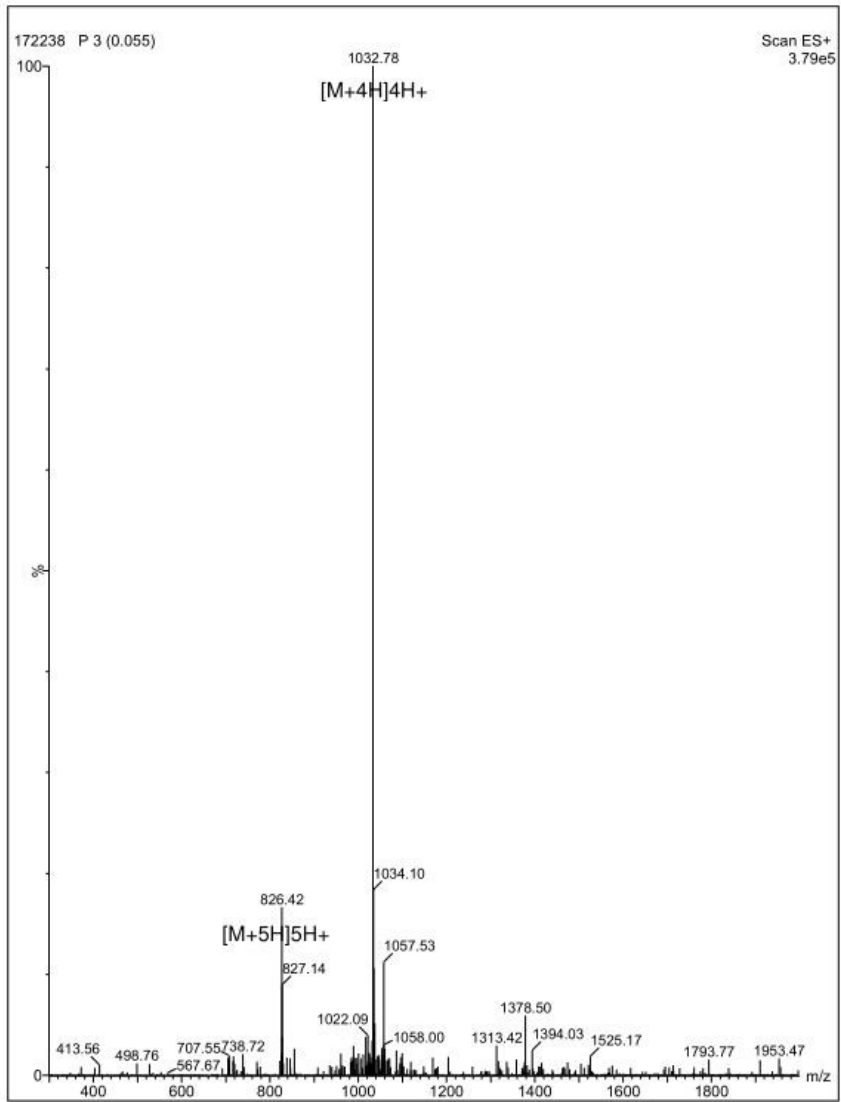

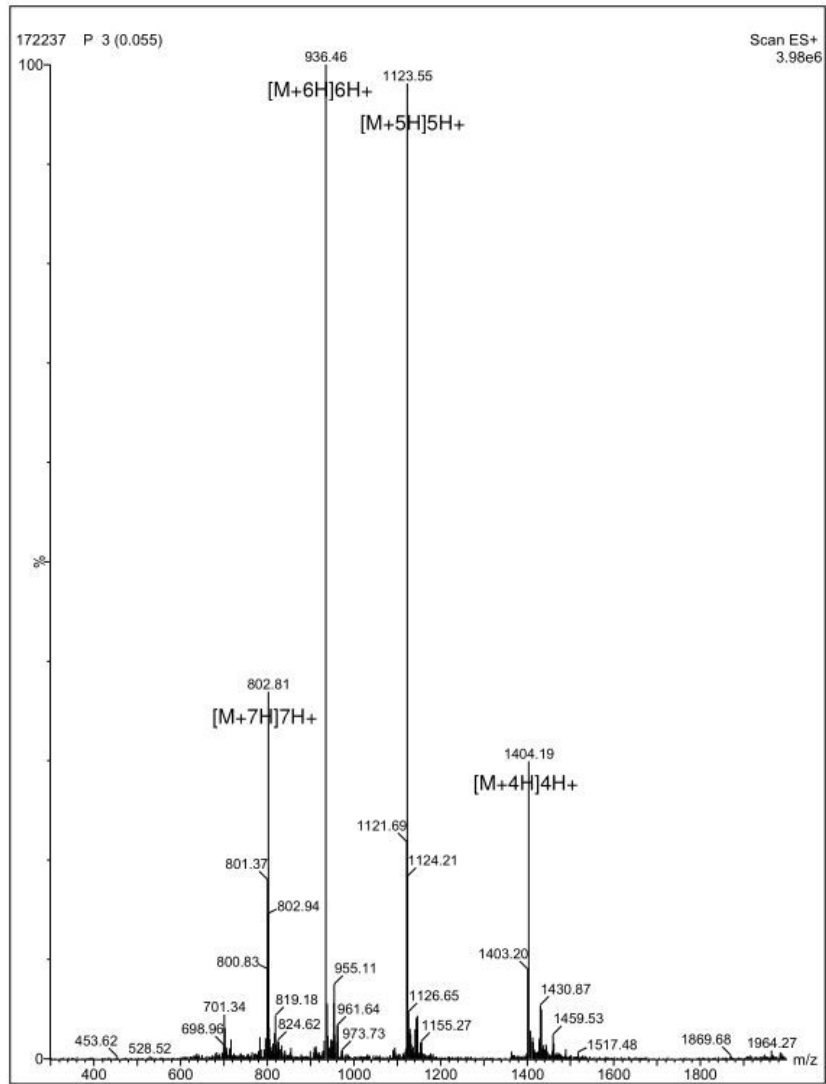

**Figure S2.** MALDI-TOF-MS or ESI-MS of peptide vectors.

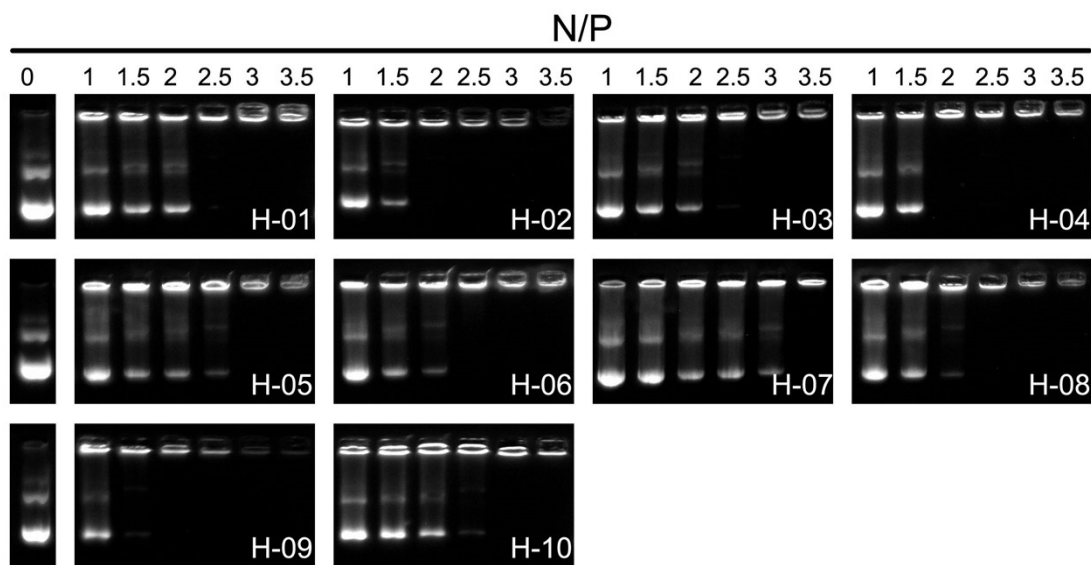

**Figure S3.** Agarose gel electrophoresis assays of peptide vectors at different N/P ratios.

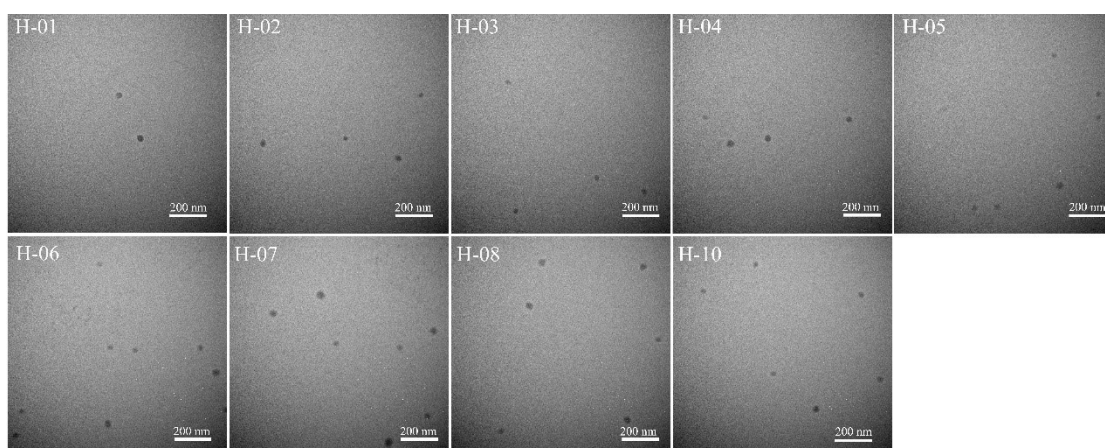

**Figure S4.** TEM images of peptide/DNA complexes at the N/P ratio of 10. The scale bar represents 200 nm.

**Table S2.** The concentrations of peptide/DNA complexes in the cytotoxicity analysis

| Compounds | Concentrations ( $\mu\text{M}$ ) |      |      |      |      |
|-----------|----------------------------------|------|------|------|------|
|           | N/P                              |      |      |      |      |
|           | 4                                | 6    | 8    | 10   | 12   |
| H-01      | 1.37                             | 2.05 | 2.74 | 3.42 | 4.11 |
| H-02      | 1.23                             | 1.85 | 2.46 | 3.08 | 3.70 |
| H-03      | 1.12                             | 1.68 | 2.24 | 2.80 | 3.36 |
| H-04      | 1.54                             | 2.31 | 3.08 | 3.85 | 4.62 |
| H-05      | 1.23                             | 1.85 | 2.46 | 3.08 | 3.85 |
| H-06      | 1.23                             | 1.85 | 2.46 | 3.08 | 3.85 |
| H-07      | 2.05                             | 3.08 | 4.11 | 5.13 | 6.16 |
| H-08      | 1.37                             | 2.05 | 2.74 | 3.42 | 4.11 |
| H-09      | 1.23                             | 1.85 | 2.46 | 3.08 | 3.70 |
| H-10      | 1.37                             | 2.05 | 2.74 | 3.42 | 4.11 |

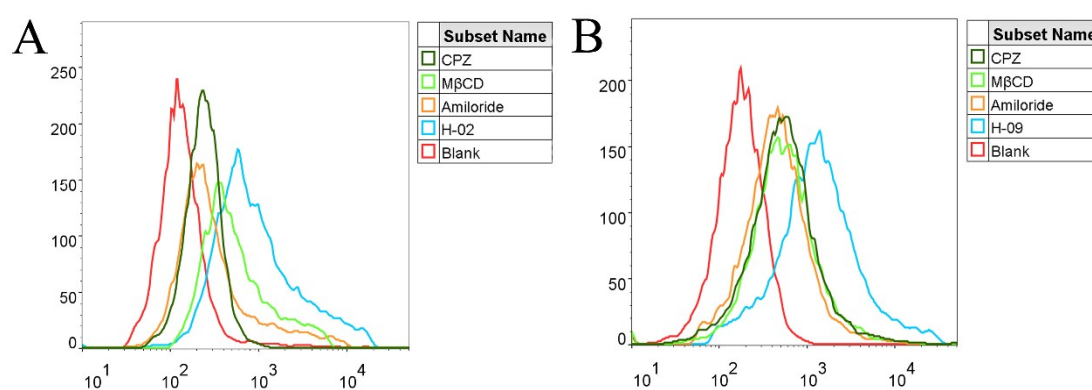

**Figure S5.** Flow cytometric analysis of cellular uptake mechanisms of H-02/DNA (A) and H-09/DNA (B) complexes in HepG2 cells using specific endocytosis inhibitors. The DNA was labeled with YOYO-1.

**Table S3.** The mean intensity of the green fluorescence in HepG2 and LO2 cells measured by ImageJ in CLSM analysis

| Compounds | Mean intensity |        |
|-----------|----------------|--------|
|           | HepG2          | LO2    |
| H-01      | 90.41          | 117.31 |
| H-02      | 198.51         | 139.97 |
| H-03      | 53.21          | 57.78  |
| H-04      | 189.18         | 158.10 |
| H-05      | 132.09         | 83.77  |
| H-06      | 86.88          | 88.12  |
| H-07      | 198.64         | 85.06  |
| H-08      | 46.99          | 83.32  |
| H-09      | 203.89         | 122.41 |
| H-10      | 113.66         | 61.18  |
| Lipo 2000 | 53.76          | 90.87  |

**Table S4.** The CLR of DAPI and YOYO-1 in live-cell imaging experiments

| Time (min) | CLR (%) |       |       |           |
|------------|---------|-------|-------|-----------|
|            | H-01    | H-02  | H-09  | Lipo 2000 |
| 5          | 7.33    | 10.27 | 16.64 | -         |
| 15         | 18.44   | 20.71 | 20.72 | 10.40     |
| 60         | 21.99   | 47.22 | 29.94 | 26.27     |
| 120        | 22.57   | 49.11 | 60.56 | 48.15     |
| 240        | -       | -     | -     | 83.64     |
